# Supplementary material for: The Effects of Incremental Doses of Aflatoxin B1 on In Vitro Ruminal Nutrient Digestibility and Fermentation Profile of a Lactating Dairy Cow Diet in a Dual-Flow Continuous Culture System
Source: MDPI journal article supplement (doi:10.3390/toxins15020090), 2023-01-18
Supplement: s1 [file s1]

# SUPPLEMENTAL MATERIAL: The Effects of Incremental Doses of Aflatoxin B<sub>1</sub> on In Vitro Ruminal Nutrient Digestibility and Fermentation Profile of a Lactating Dairy Cow Diet in a Dual-Flow Continuous Culture System

Felipe Xavier Amaro, Yun Jiang, Kathy Arriola, Matheus R. Pupo, Bruna C. Agostinho, Sarah L. Bennett, James R. Vinyard, Lais Tomaz, Richard R. Lobo, Andres Pech-Cervantes, Jose A. Arce-Cordero, Antonio P. Faciola, Adegbola Tolulope Adesogan and Diwakar Vyas

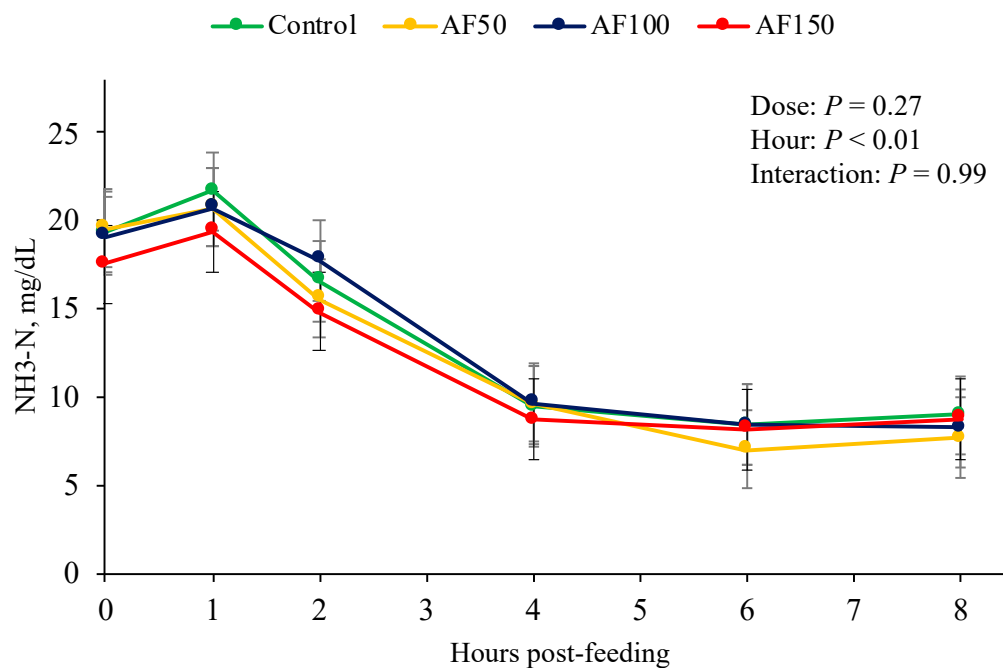

**Figure S1.** Effect of dose of aflatoxin B<sub>1</sub> (AFB<sub>1</sub>) by sampling hour interaction on NH<sub>3</sub>-N concentration in dual-flow continuous culture system.

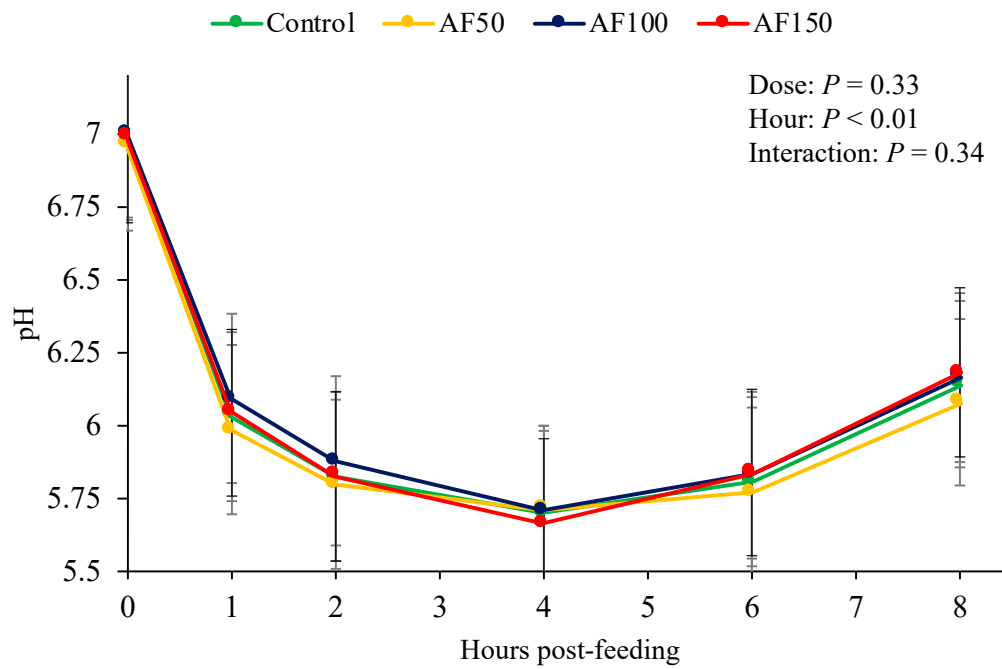

**Figure S2.** Effect of dose of aflatoxin B<sub>1</sub> (AFB<sub>1</sub>) by sampling hour interaction on pH in the dual-flow continuous culture system.

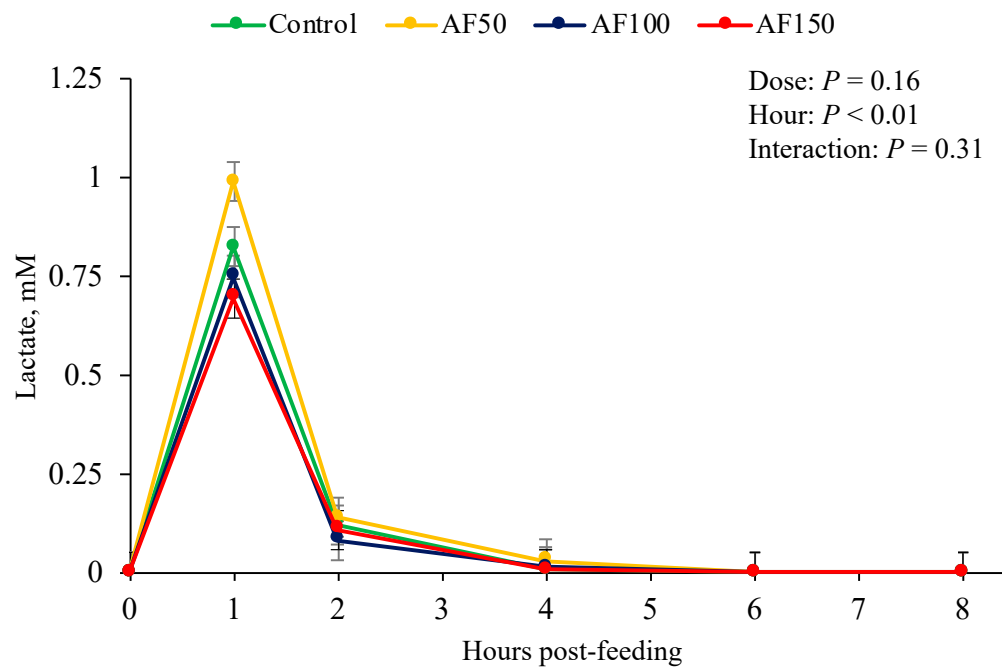

**Figure S3.** Effect of dose of aflatoxin B<sub>1</sub> (AFB<sub>1</sub>) by sampling hour on lactate concentration in the dual-flow continuous culture system.

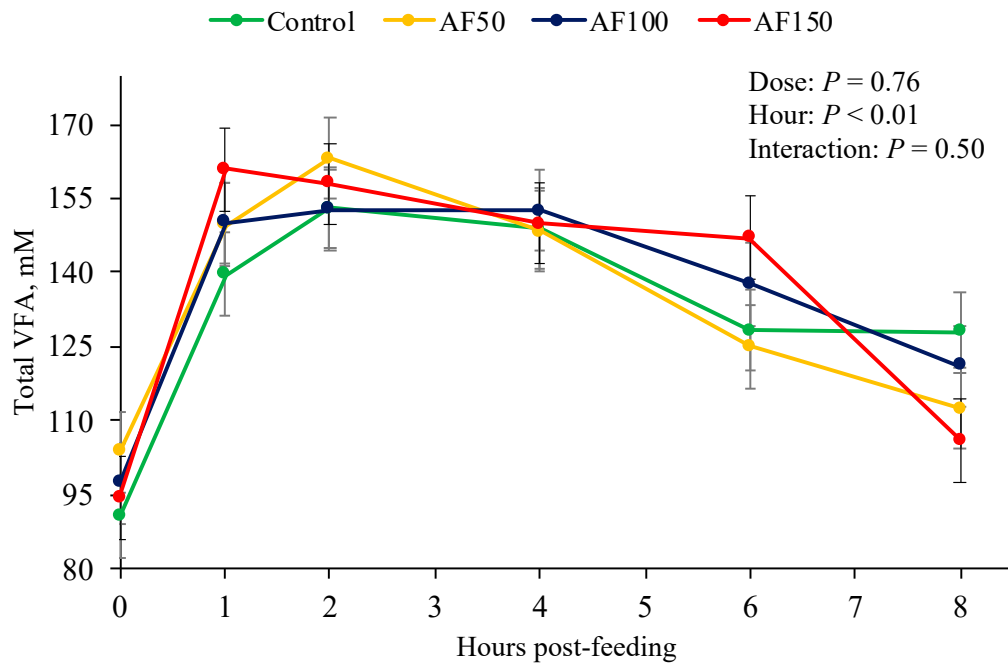

**Figure S4.** Effect of dose of aflatoxin B<sub>1</sub> (AFB<sub>1</sub>) by sampling hour on total VFA concentration in the dual-flow continuous culture system.

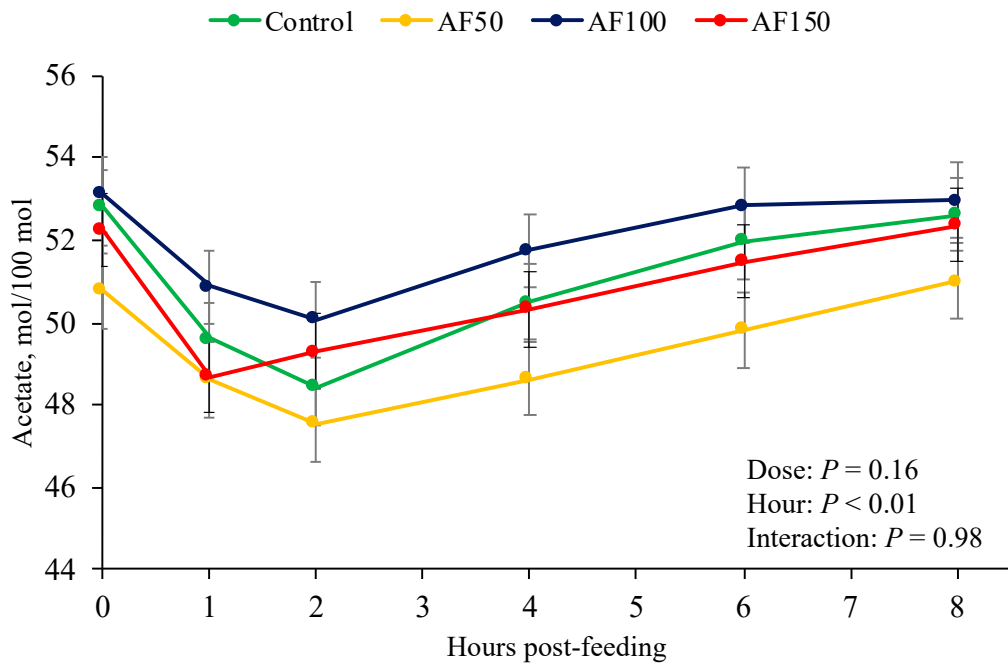

**Figure S5.** Effect of dose of aflatoxin B<sub>1</sub> (AFB<sub>1</sub>) by sampling hour on acetate molar proportion in the dual-flow continuous culture system.

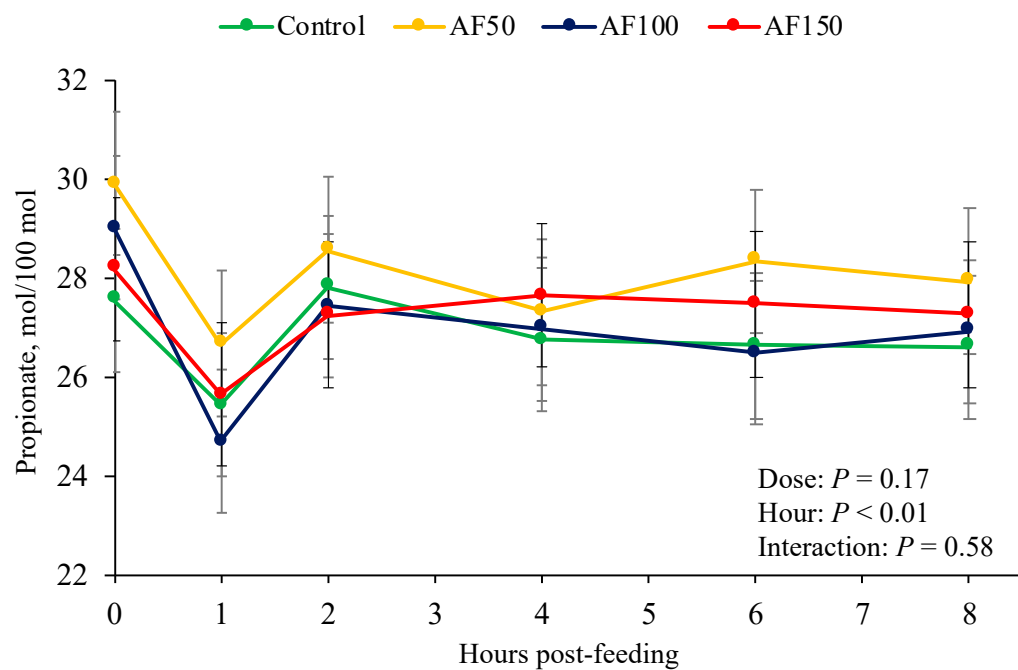

**Figure S6.** Effect of dose of aflatoxin B<sub>1</sub> (AFB<sub>1</sub>) by sampling hour on propionate molar proportion in the dual-flow continuous culture system.

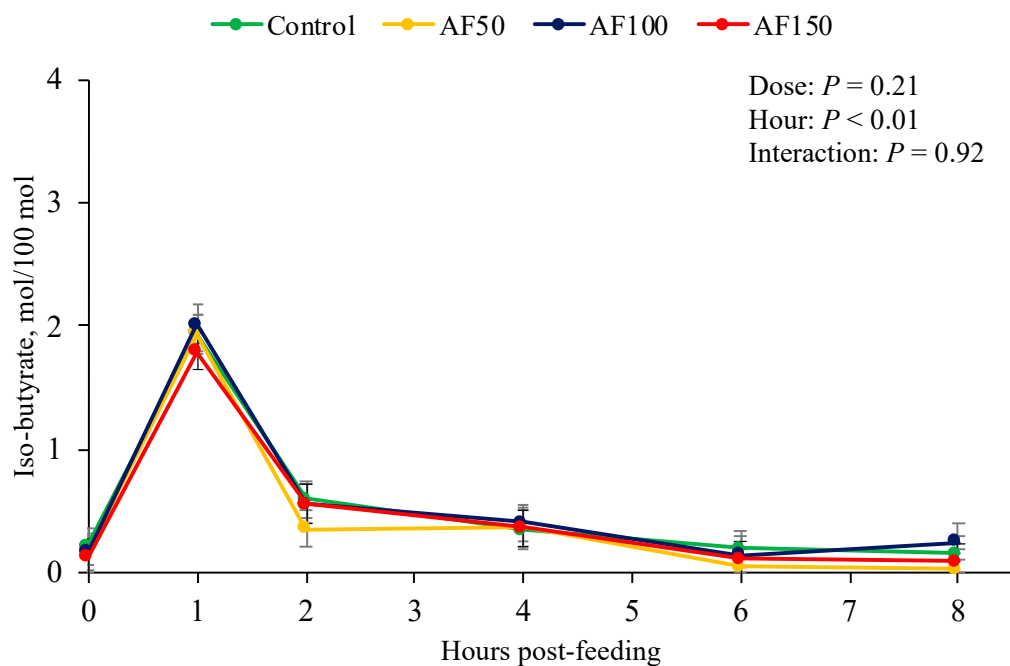

**Figure S7.** Effect of dose of aflatoxin B<sub>1</sub> (AFB<sub>1</sub>) by sampling hour on iso-butyrate molar proportion in the dual-flow continuous culture system.

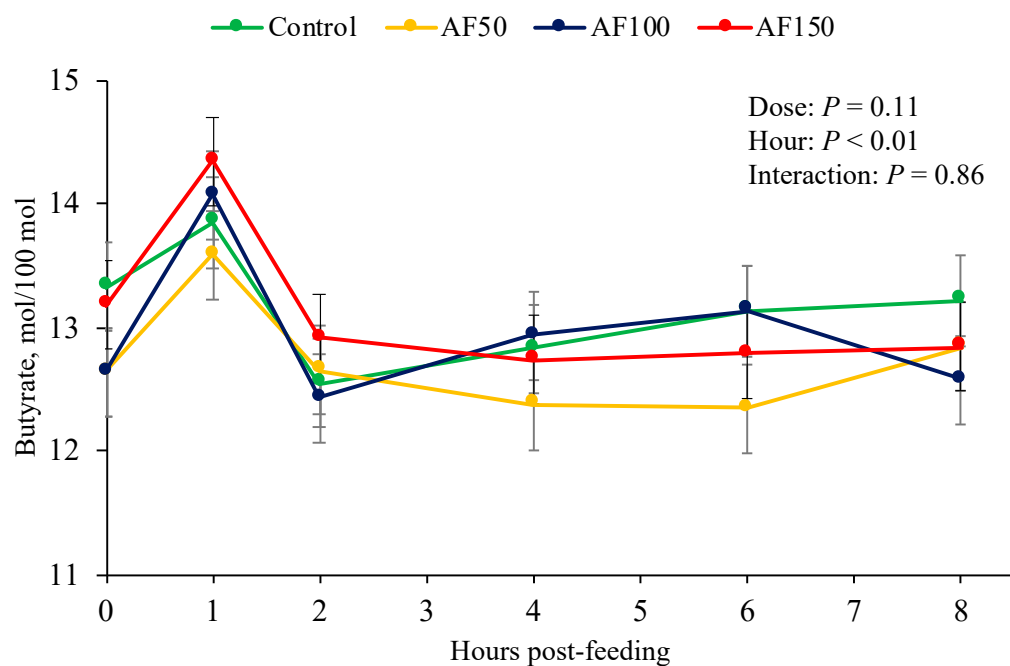

**Figure S8.** Effect of dose of aflatoxin B<sub>1</sub> (AFB<sub>1</sub>) by sampling hour on butyrate molar proportion in the dual-flow continuous culture system.

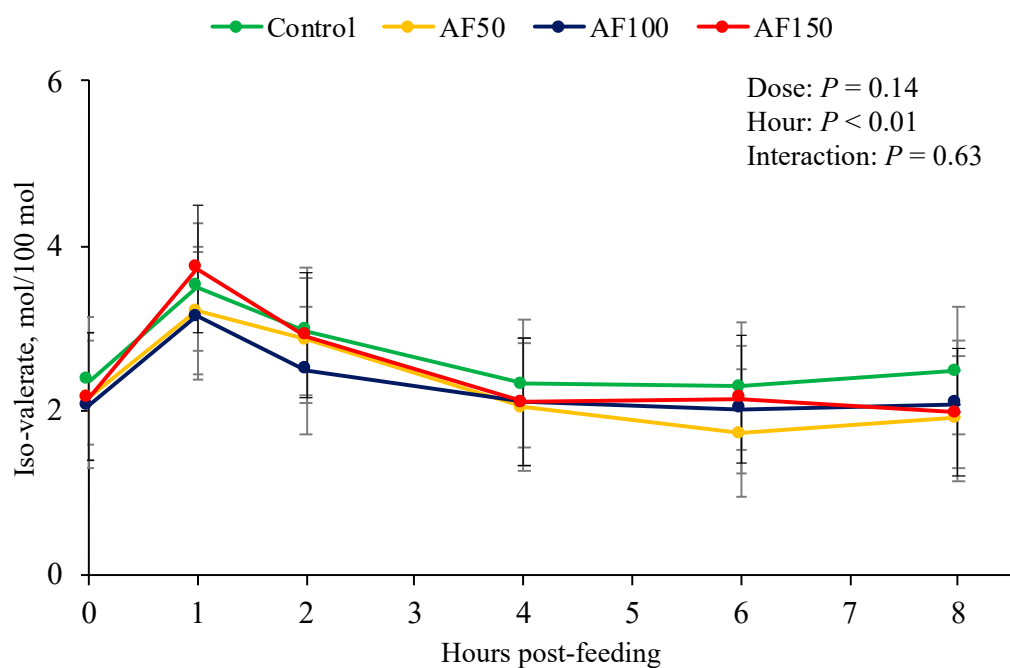

**Figure S9.** Effect of dose of aflatoxin B<sub>1</sub> (AFB<sub>1</sub>) by sampling hour on iso-valerate molar proportion in the dual-flow continuous culture system.

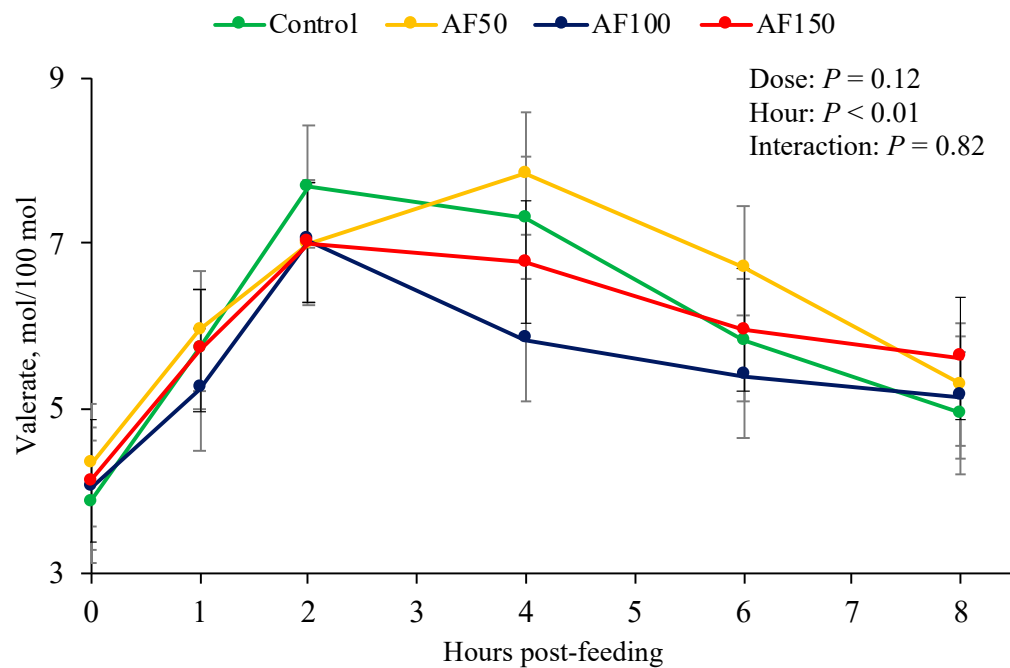

**Figure S10.** Effect of dose of aflatoxin B<sub>1</sub> (AFB<sub>1</sub>) by sampling hour on valerate molar proportion in the dual-flow continuous culture system.

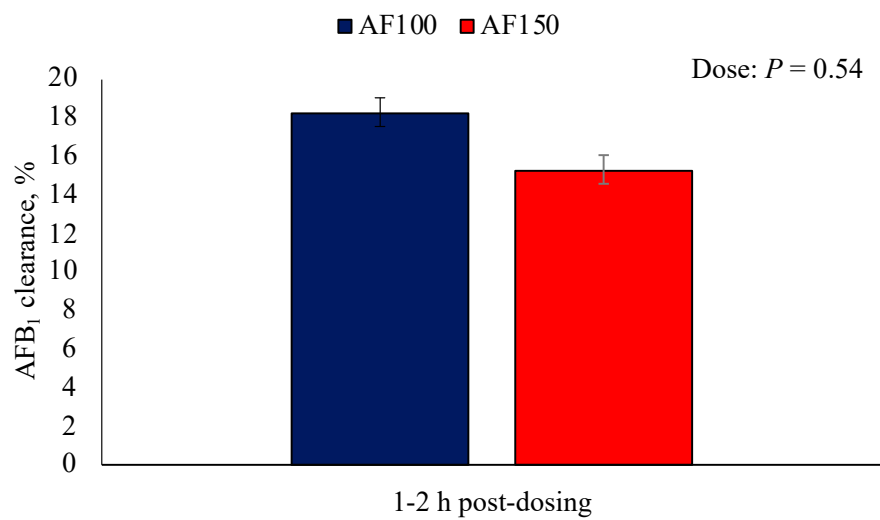

**Figure S11.** Effect of dose of aflatoxin B<sub>1</sub> (AFB<sub>1</sub>) on hourly clearance rate of AFB<sub>1</sub> in a dual-flow continuous culture system fed a lactating dairy cow diet.
